# Supplementary material
Source: PubMed Central journal article supplement (PMC4258174)
Supplement: NIHMS636581-supplement-304398R2_Online_Data_Supplement.pdf [file NIHMS636581-supplement-304398R2_Online_Data_Supplement.pdf]

## SUPPLEMENTAL MATERIAL

**Detailed Methods**

*Sample Preparation.* Liver (125), adrenal (17), kidney (ten) and small bowel (ten) tissue samples were provided by the Cooperative Human Tissue Network, funded by the National Cancer Institute. We acknowledge use of human adrenal tissues (18) provided by the National Disease Research Interchange (NDRI). Lung biopsy specimens (30) were provided by the Ohio State University Tissue Procurement Pathology Core. Finally, 20 LC samples were provided via the Neuropathology Core of the Emory Neuroscience NINDS Core Facilities. Human autopsy/biopsy tissue samples were either flash frozen in liquid nitrogen, or provided fresh in RNAlater (Qiagen). All samples were obtained under protocols approved by the local Institutional Review Boards. RNA<sup>1</sup> and DNA<sup>2</sup> were isolated from tissues as previously described, and RNA quality was assessed using the Bioanalyzer (Agilent Technologies). cDNA was synthesized via reverse transcription with SuperScript III (Invitrogen), oligo-dT, and gene-specific primers.

*Genotyping.* The human tissue samples used for the AEI assays were genotyped for the SNPs listed in Online Tables I and II at The Ohio State University as follows. Fluorescent restriction fragment length polymorphism was used if the SNP of interest was included in a restriction enzyme cut site. If not, SNPs were genotyped with allele-specific melting curve analysis.<sup>3</sup> The SNaPshot primer extension assay described below was also used in genotype determination. Primer sequences and assay type used are listed in Online Table IV. Genome-wide genotyping in the clinical cohorts was performed at outside institutions as described in the PheWAS and Genetic Association Study sections below.

*Allelic mRNA Expression Analysis.* The SNaPshot (Life Technologies) primer extension assay was used to measure allelic mRNA ratios in heterozygous carriers of a marker SNP in the transcribed region.<sup>1</sup> A target region containing the SNP is PCR-amplified. A single base extension reaction adds a fluorescently labeled dideoxynucleotide complementary to the SNP. The signal is quantitated on a 3730 DNA Analyzer capillary electrophoresis instrument (Life Technologies). The allelic mRNA ratios are calculated from the abundance of major over minor allele of the SNP and normalized to the mean of the genomic DNA ratios. The inverse was taken if the ratio was below one for rs77905.

As the two marker SNPs were located near the borders of exons, separate primers were designed for use with DNA and cDNA. In order to ensure there were no differences in amplification, samples homozygous for either the major or minor allele were selected, and a larger piece of DBH, ~550bp, was amplified with a different set of primers. This product was purified and quantitated. The products were combined in differing ratios, 1:4, 2:3, 1:1, and 3:2, diluted, used as template for the PCR reaction, and carried through the SNaPshot procedure. Duplicates were run on the 3730 DNA analyzer, and peak area ratios were compared to template ratios. The reactions were equally efficient, validating the use of different primers sets for the DNA and cDNA (Online Figure I).

*Quantitative Real-Time reverse transcriptase PCR (qRT-PCR).* DBH mRNA expression was measured by qRT-PCR with a 7500 Fast Real-Time PCR System (Life Technologies). Reactions were prepared in 10  $\mu$ l volumes with Fast SYBR Green Master Mix (Applied Biosystems) and cDNA synthesized from 25 ng of total RNA. Primers spanning the exon 2-3 junction, including rs1108580 were used for DBH detection. Threshold values were set to 0.2 using the 7500 Software v2.0.5 (Applied Biosystems) and threshold cycle numbers ( $C_T$ ) were computed for each well.<sup>4</sup> The mean *PGKI* amplification  $C_T$  value was subtracted from the mean *DBH*  $C_T$  value for each sample to calculate the  $\Delta C_T$ , and obtain standardized values. A lower value is indicative of higher mRNA expression. To assure specific detection of mRNA, assays were replicated for a subset of samples using a Taqman probe spanning the exon 11-12 junction (Life Technologies) with GAPDH as a housekeeping gene.

*DNA Sequencing Using Ion Torrent.* Regions of the gene (~2-3kb) were PCR amplified using NEB (New England Biolabs) or JumpStart Mastermix (Sigma). Amplicons were combined based on length and concentration and treated with exonuclease followed by phenol-chloroform extraction. The sample was fragmented using Covaris shearing, and barcoded libraries were prepared using NEBNext Fast DNA Library Prep Set for Ion Torrent, the Ion Xpress Barcode Adapters Kit and the Ion One Touch Template Kit. The library was sequenced on the Ion Torrent, using the Ion Torrent Ion PGM Sequencing Kit (Life Technologies).

*Statistical Analyses.* SVS software (Golden Helix) was used to calculate linkage disequilibrium (LD) and  $R^2$  values between SNPs, allele frequencies, Hardy-Weinberg equilibrium, and perform genotype association tests and regression analyses. One-way ANOVA and t-test were performed with GraphPad Prism and  $p < 0.05$  was considered to be significant when a specific hypothesis was tested. In SPSS v21 (IBM), stepwise linear regression using age, race and gender was used to determine the effect of subject demographics on DBH mRNA expression

*5' RACE (rapid amplification of cDNA ends).* 5'UTRs (untranslated regions) were captured and sequenced using the FirstChoice RLM-RACE Kit (Ambion).

*Jackson Laboratories Mouse Phenome Database.* This resource is a collection of microarray and phenotype data from different laboratories on standard inbred mouse strains and can be accessed at: <http://phenome.jax.org>. In the analysis 2,483 phenotypes were included although many were related and therefore not entirely independent.

*Measurements of cardiac pre-ejection period (PEP) as an index of myocardial contractility and sympathetic control.* All participants were recruited from the University of Chicago and surrounding area. The subjects were 47% male with an average age of  $21.2 \pm 2.5$  years. Ethnicity of the population was diverse with 52% Caucasian, 27% Asian, 9% African American, 5% Hispanic and 7% other. Participants reported no chronic mental or physical illness. The research was approved by the University of Chicago IRB. Cardiovascular sympathetic cardiac control was assessed as pre-ejection period (PEP), derived from the electrocardiogram and the impedance cardiogram, representing the period between the electrical invasion of the ventricular myocardium (Q wave of the ECG) and the opening of the aortic valve. The impedance cardiogram was obtained using the standard tetrapolar electrode system as described.<sup>5</sup> The ECG (lead II configuration) and basal thoracic impedance (Z0) were measured using a Bionex system (Mindware) and the  $dZ/dt$  waveforms were analyzed to obtain PEP. For each subject, ECG and impedance data were ensemble averaged for each minute of the stress task to produce estimates of the PEP. PEP depends on the time development of intraventricular pressure, widely used as an index of myocardial contractility. Because variations in contractility are largely under sympathetic control, PEP is commonly used as a noninvasive measure of sympathetic cardiac control,<sup>6</sup> with lower PEP values representing higher levels of sympathetic cardiac control. A subset of participants underwent a Trier Social Stress Test (TSST), a widely used laboratory psychosocial stressor known to elicit cardiovascular responses in adults.<sup>7</sup> The modified TSST protocol consisted of a two minute preparation period and a three minute speech. PEP data were averaged across all five minutes to provide a single value for the stress condition. Regression analysis using stress PEP as the quantitative dependent variable included ethnicity as a covariate.

*Phenome-Wide Association Study (PheWAS).* A PheWAS was performed using data from the Geisinger Clinic MyCode biorepository, on 3,035 subjects.<sup>8</sup> Clinical and demographic information was obtained from electronic health records (EHR). We defined case-control status using International Classification of Diseases, Ninth Edition (ICD-9) diagnosis codes from the EHR. We required  $> 3$  of the same ICD-9 code per individual and  $> 10$  case subjects, resulting in 482 phenotypes. All phenotypes meeting the

inclusion criteria were analyzed and not filtered to target specific diseases. The nervous system related disorders in the analysis were: convulsions, nondependent abuse of drugs, depression, bipolar, episodic mood disorders, anxiety dissociative and somatoform disorders, special symptoms or syndromes not elsewhere classified, adjustment reaction, organic sleep disorders, other cerebral degenerations, Parkinson's disease, other extrapyramidal disease and abnormal movement disorders, pain not elsewhere classified, multiple sclerosis, migraine, trigeminal nerve disorders, mononeuritis of upper limb and mononeuritis multiplex, hereditary and idiopathic peripheral neuropathy, inflammatory and toxic neuropathy. Using the case/control status and the two SNPs [rs1611115 MAF (T) 0.22; rs1108580 MAF (A) 0.47] we calculated associations using logistic regression via custom script in R,<sup>9</sup> adjusting models for age and sex. Associations were calculated using additive, recessive, and dominant genetic encoding, where the minor allele was the coded allele. We also tested pairwise SNP-SNP interactions. We determined the significance of the interaction via likelihood ratio test (LRT), comparing full versus reduced models, using logistic regression. The full model was: SNP1 + SNP2 + SNP1\*SNP2 and the reduced model was: SNP1 + SNP2.

To seek replication for our PheWAS results, we used data on 4,027 individuals from The Marshfield Personalized Medicine Research Project (PMRP) biobank and linked EHR.<sup>10</sup> ICD-9 codes are organized in a hierarchical manner, with main categories and sub-categories. We first identified the main ICD-9 code category for any results within our discovery *MyCode* that had an association  $p < 0.01$ . Then we identified all ICD-9 codes within those categories - as different medical centers often use different ICD-9 codes by habit of practice, resulting in 92 phenotypes. We then defined case/control status for all of those ICD-9 codes using the same criteria used for the discovery *MyCode* PheWAS and performed the analysis the same way.

In the Marshfield PMRP dataset, genome-wide genotyping was performed at the Center for Inherited Disease Research (CIDR) using the Illumina 660W-Quad Beadchip. Genotyping calls were made at CIDR using BeadStudio version 3.3.7. For the Geisinger MyCode data set genotyping was performed at the University of Pittsburgh Genomics and Proteomics Core Laboratories using the Illumina Omni Express Beadchip. Genotyping calls were made at the University of Pittsburgh using GenomeStudio. Data for both sets were cleaned using the eMERGE QC pipeline developed by the eMERGE Genomics Working Group.<sup>11</sup> This process includes evaluation of sample and marker call rate, gender mismatch, duplicate and HapMap concordance, batch effects, Hardy-Weinberg equilibrium, sample relatedness, and population stratification. For the current PheWAS, only the two SNPs of interest were extracted from the GWAS dataset.

*Genetic Association Study.* Data from the Jackson Heart Study (JHS), which investigates cardiovascular risk factors were used.<sup>12</sup> Participants are African-American men and women from the three counties surrounding Jackson, MS. For the current analysis, rs1611115 was genotyped directly using the CARE IBC Array<sup>13</sup> in 2,762 participants at the Broad Institute of Harvard and MIT, and was imputed in an additional 262 individuals, using Affymetrix 6.0 genotypes and a 1000 Genomes reference panel as described.<sup>14</sup> Genotypes for rs1108580, were imputed in all 3,024 participants. After excluding participants with coronary heart disease (CHD) at baseline or with missing data for incident myocardial infarction (MI), 2,378 participants were available for analysis. In addition to MI, procedures included in the incident CHD outcome include coronary artery bypass grafts and coronary angioplasty. Genotype association tests were performed with an additive model, counting the number of copies of the *T* allele for rs1611115 and *A* allele for rs1108580. The data were adjusted for baseline age, sex, hypertension, and type II diabetes, as well as 10 principal components to adjust for potential ethnic stratification. All analyses were approved by the Institutional Review Board of the University of Mississippi Medical Center.

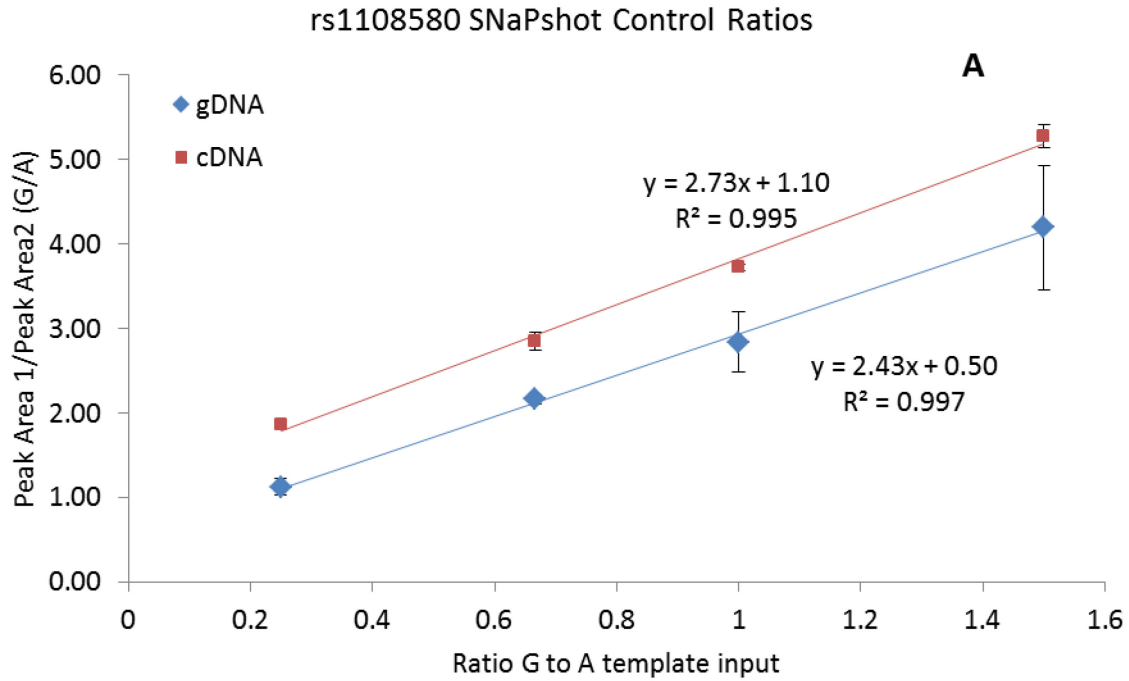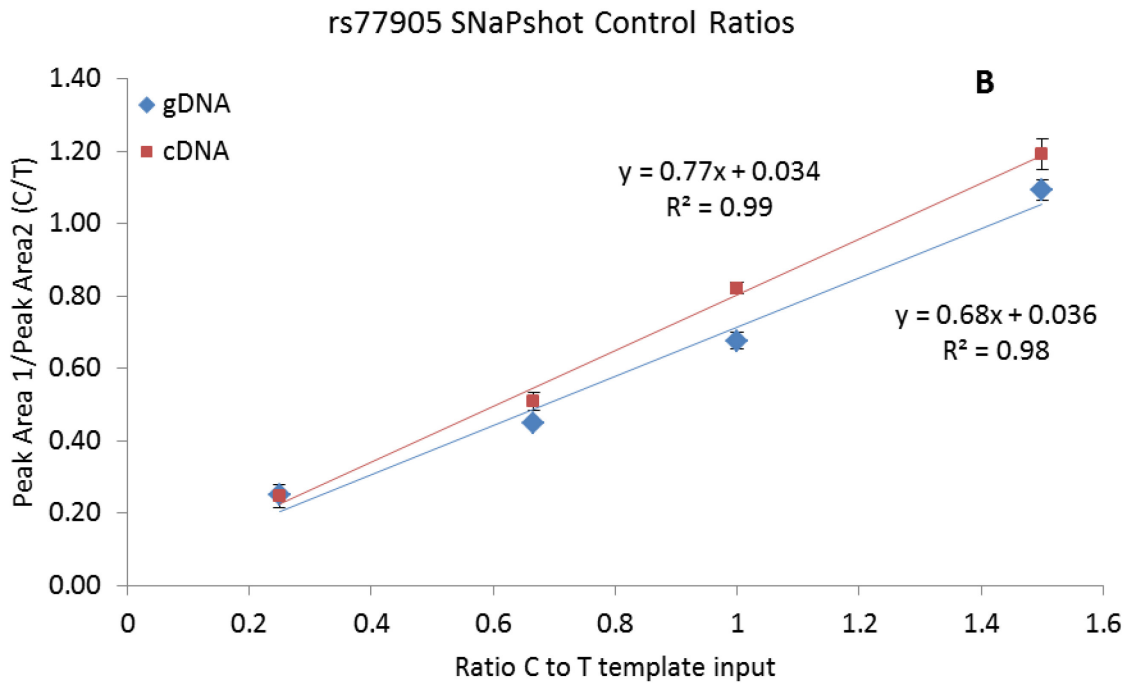

**Online Figure I: Efficiency comparison of primers for PCR amplification of DNA and RNA** around rs1108580 (A) and rs77905 (B). Separate primer sets were used as both SNPs are near the border of an exon. The products were combined in differing ratios, 1:4, 2:3, 1:1, and 3:2, diluted, used as template for the PCR reaction, and used in the SNaPshot assay. Peak area ratios were compared to input ratios. A diamond indicates gDNA primers, while a square indicates cDNA primers.

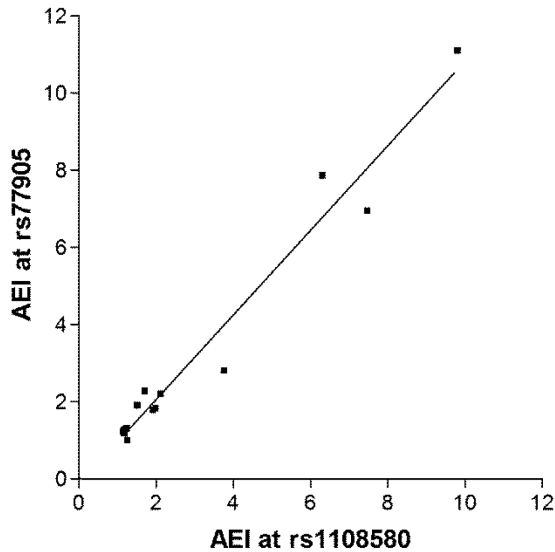

**Online Figure II: Linear regression of average AEI magnitude measured at two marker SNPs: rs1108580 and rs77905** in any samples heterozygous for both marker SNPs in all tissues. The equation of the line was  $y = 1.1x - 0.14$  with  $R^2 = 0.96$ . In order to compare the magnitude of the values, we used the inverse of ratios below 1.

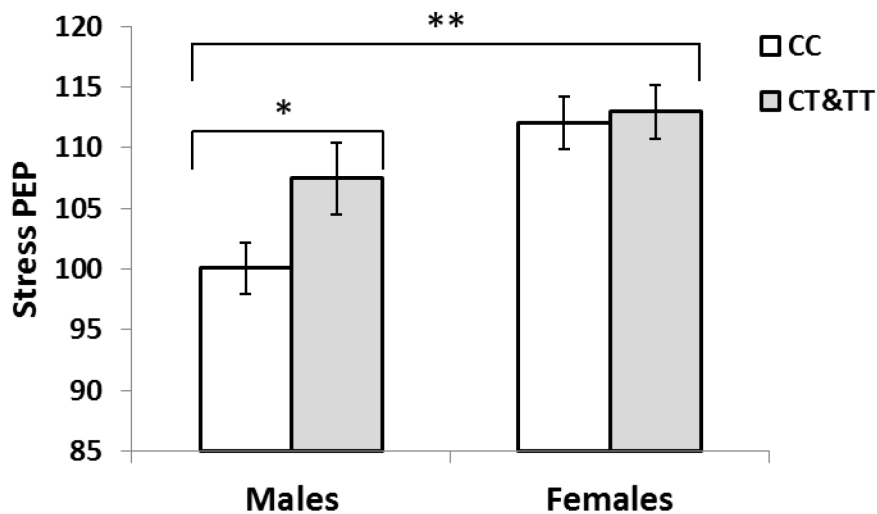

**Online Figure III: Myocardial contractility and sympathetic control measured by cardiac pre-ejection period (PEP)** with subjects sorted by gender and rs1611115 genotype. Average stress PEP was calculated for each genotype, pooling heterozygous and homozygous minor alleles together. There was a significant difference between males and females ( $p = 1.9E-05$ ), therefore they were analyzed separately. There was no significant genotype effect in females ( $p = 0.77$ ). In males, a t-test demonstrated a significant difference in stress PEP between subjects homozygous for the major allele and those carrying at least one copy of the minor allele ( $p < 0.05$ , effect size  $d = 0.54$ ).

**Online Table I: SNPs genotyped and genotype association test using the F statistic**

| Marker                    | Location | Minor Allele | MAF  | Association of SNP with rs77905 AEI values (F-test p) | Association of SNP with rs1108580 AEI values (F-test p) |
|---------------------------|----------|--------------|------|-------------------------------------------------------|---------------------------------------------------------|
| rs1079783                 | upstream | G            | 0.25 | 0.16                                                  | 0.92                                                    |
| rs3025343                 | upstream | A            | 0.10 | 0.48                                                  | 0.51                                                    |
| rs141116007 and CA repeat | upstream | B            | 0.41 | 0.047                                                 | 0.098                                                   |
| rs1076150                 | upstream | T            | 0.49 | 0.28                                                  | 0.60                                                    |
| rs1989787                 | upstream | A            | 0.34 | 0.54                                                  | 0.26                                                    |
| rs1611115                 | upstream | T            | 0.21 | 0.0016                                                | 2.0E-07                                                 |
| rs2519143*                | intron 1 | A            | 0.20 | 0.0016                                                | 2.9E-07                                                 |
| rs1108580                 | exon 2   | A            | 0.46 | 0.20                                                  | x†                                                      |
| rs77905                   | exon 9   | T            | 0.46 | x†                                                    | 0.57                                                    |
| rs6271                    | exon 11  | T            | 0.06 | 0.67                                                  | 0.24                                                    |
| rs129882                  | exon 12  | T            | 0.25 | 0.43                                                  | 0.46                                                    |

\*rs2519143 scored with similar p values compared to rs1611115 but was excluded as the causative SNP because it was homozygous in a tissue showing strong AEI.

†When used as the marker SNP, rs1108580 and rs77905 could not be tested as all samples were heterozygous.

**Online Table II: LD values (D' and R<sup>2</sup>) for all SNPs genotyped in liver**

| Marker               | D'        | R <sup>2</sup>       | D'     | R <sup>2</sup> | D'   | R <sup>2</sup> | D'   | R <sup>2</sup> | D'   | R <sup>2</sup> | D'   | R <sup>2</sup> | D'   | R <sup>2</sup> |
|----------------------|-----------|----------------|-----------|----------------|-----------|----------------|-----------|----------------|-----------|----------------------|--------|----------------|------|----------------|------|----------------|------|----------------|------|----------------|------|----------------|
|                      | rs1611115 | rs129882       | rs1108580 | rs77905        | rs2519143 | rs3025343      | rs1989787 | rs1079783      | rs1076150 | rs141116007 & CA rep | rs6271 |                |      |                |      |                |      |                |      |                |      |                |
| rs1611115            | 1.00      | 1.00           | .         | .              | .         | .              | .         | .              | .         | .                    | .      | .              | .    | .              | .    | .              | .    | .              | .    | .              | .    | .              |
| rs129882             | 0.29      | 0.00           | 1.00      | 1.00           | .         | .              | .         | .              | .         | .                    | .      | .              | .    | .              | .    | .              | .    | .              | .    | .              | .    | .              |
| rs1108580            | 0.73      | 0.15           | 0.40      | 0.04           | 1.00      | 1.00           | .         | .              | .         | .                    | .      | .              | .    | .              | .    | .              | .    | .              | .    | .              | .    | .              |
| rs77905              | 0.11      | 0.00           | 0.06      | 0.00           | 0.04      | 0.00           | 1.00      | 1.00           | .         | .                    | .      | .              | .    | .              | .    | .              | .    | .              | .    | .              | .    | .              |
| rs2519143            | 0.91      | 0.79           | 0.02      | 0.00           | 0.77      | 0.16           | 0.44      | 0.02           | 1.00      | 1.00                 | .      | .              | .    | .              | .    | .              | .    | .              | .    | .              | .    | .              |
| rs3025343            | 0.99      | 0.03           | 0.98      | 0.04           | 0.07      | 0.00           | 1.00      | 0.18           | 0.99      | 0.03                 | 1.00   | 1.00           | .    | .              | .    | .              | .    | .              | .    | .              | .    | .              |
| rs1989787            | 1.00      | 0.14           | 0.63      | 0.13           | 1.00      | 0.40           | 0.26      | 0.06           | 1.00      | 0.12                 | 0.22   | 0.01           | 1.00 | 1.00           | .    | .              | .    | .              | .    | .              | .    | .              |
| rs1079783            | 0.50      | 0.01           | 0.27      | 0.06           | 0.55      | 0.06           | 0.58      | 0.08           | 0.69      | 0.02                 | 1.00   | 0.04           | 0.70 | 0.19           | 1.00 | 1.00           | .    | .              | .    | .              | .    | .              |
| rs1076150            | 1.00      | 0.26           | 0.27      | 0.02           | 0.94      | 0.80           | 0.06      | 0.00           | 0.87      | 0.19                 | 0.16   | 0.00           | 1.00 | 0.46           | 0.39 | 0.03           | 1.00 | 1.00           | .    | .              | .    | .              |
| rs141116007 & CA rep | 0.82      | 0.27           | 0.60      | 0.05           | 0.38      | 0.10           | 0.35      | 0.04           | 0.86      | 0.27                 | 0.75   | 0.04           | 0.83 | 0.21           | 0.56 | 0.04           | 0.40 | 0.10           | 1.00 | 1.00           | .    | .              |
| rs6271               | 1.00      | 0.02           | 0.99      | 0.02           | 0.49      | 0.01           | 1.00      | 0.09           | 1.00      | 0.02                 | 0.32   | 0.05           | 0.53 | 0.03           | 0.97 | 0.02           | 0.54 | 0.02           | 1.00 | 0.04           | 1.00 | 1.00           |

**Online Table III: Liver gDNA genotypes obtained from Ion Torrent Sequencing**

See Excel sheet.

\*“Het” indicates a heterozygous sample, whereas “hom” indicates homozygous for the variant allele. Samples that were homozygous for the reference allele were not called by the software and therefore not listed in the table.

**Online Table IV: Primer sequences and reaction conditions.**

See Excel sheet.

\*All PCR reactions begin with a 5 minute denaturation step at 95°C, 30 cycles of PCR (unless otherwise noted), followed by a 10 minute extension step at 72°C. Cycling conditions are listed with denaturation, annealing extension times in seconds (s) or minutes (m) with corresponding temperatures in parentheses.

**Online Table V: Demographics for liver samples used in qRT-PCR**

| Demographic | Group (n)      | Mean $\pm$ SD   | DBH Expression ( $\Delta C_T$ )* | Pearson Correlation (p value) † |
|-------------|----------------|-----------------|----------------------------------|---------------------------------|
| Sex         | Male (25)      |                 | 6.6 $\pm$ 1.0                    | 0.1                             |
|             | Female (32)    |                 | 6.2 $\pm$ 1.0                    |                                 |
| Race        | Caucasian (49) |                 | 6.4 $\pm$ 1.0                    | 0.5                             |
|             | Other (8)      |                 | 6.4 $\pm$ 0.9                    |                                 |
| Age         |                | 62.3 $\pm$ 13.2 |                                  | 0.3                             |

\*The mean PGK1 amplification  $C_T$  was subtracted from the mean DBH  $C_T$ .

†As p values for the Pearson correlation were all  $>0.05$ , no variables were included as covariates in the analysis.

**Online Table VI: Correlation between phenotype and *Dbh* liver mRNA expression from Jackson Laboratory database**

| Phenotype                                                                                                             | p value* | Pearson R | Chr location |
|-----------------------------------------------------------------------------------------------------------------------|----------|-----------|--------------|
| Grip Strength                                                                                                         | 0.000030 | -0.92     | 2:27173449   |
| Percent Lean                                                                                                          | 0.00011  | 0.79      | 2:27174217   |
| Percent Fat                                                                                                           | 0.00011  | -0.79     | 2:27174217   |
| Body Weight day 120 (60d post-exposure)                                                                               | 0.00017  | -0.840    | 2:27174217   |
| Food Intake                                                                                                           | 0.00019  | 0.92      | 2:27173449   |
| Body Weight day 0                                                                                                     | 0.00020  | -0.84     | 2:27174217   |
| Triglycerides                                                                                                         | 0.00021  | 0.87      | 2:27173449   |
| Total Tissue Mass                                                                                                     | 0.00028  | -0.87     | 2:27173449   |
| Water Intake                                                                                                          | 0.00040  | 0.90      | 2:27173449   |
| R-wave Amplitude                                                                                                      | 0.00047  | 0.81      | 2:27174217   |
| Body Length                                                                                                           | 0.00048  | -0.81     | 2:27173449   |
| protein phosphatase 1 regulatory (inhibitor) subunit 1B (PPP1R1B), relative fluorescence intensity in cerebral cortex | 0.00053  | 0.89      | 2:27173449   |
| Weight of Fat Tissue                                                                                                  | 0.00056  | -0.73     | 2:27174217   |
| Percent Fat                                                                                                           | 0.00059  | -0.71     | 2:27174217   |
| Grip Strength                                                                                                         | 0.00064  | -0.84     | 2:27173449   |
| Elevated plus maze, time spent in center 5 x 5 cm hub                                                                 | 0.00070  | 0.76      | 2:27174217   |
| CCAAT/enhancer binding protein (C/EBP), alpha (Cebpa), relative mRNA abundance                                        | 0.00071  | 0.86      | 2:27173449   |
| Total Tissue Mass                                                                                                     | 0.00081  | -0.79     | 2:27172582   |
| Fucosyltransferase 9 (FUT9), relative fluorescence intensity in cerebral cortex                                       | 0.00083  | 0.79      | 2:27174217   |
| Total Tissue Mass                                                                                                     | 0.00087  | -0.77     | 2:27172582   |
| Body Weight                                                                                                           | 0.00090  | -0.77     | 2:27174217   |
| Total Body Area                                                                                                       | 0.00091  | -0.78     | 2:27173449   |
| Total Tissue Mass                                                                                                     | 0.0010   | -0.76     | 2:27173449   |
| Fear conditioning chamber, percent time spent near chamber walls, day 2                                               | 0.0010   | 0.85      | 2:27172582   |

\*All results with  $p \leq 0.001$

**Online Table VII: PheWAS analysis results of each individual SNP, using an additive model**

| SNP       | Coded Allele (minor) | Beta  | SE   | Odds Ratio | 95% CI    | pval    | ICD-9 Code | ICD-9 Description                                                                     | Cases | Ctrls |
|-----------|----------------------|-------|------|------------|-----------|---------|------------|---------------------------------------------------------------------------------------|-------|-------|
| rs1108580 | A                    | -0.78 | 0.19 | 0.46       | 0.32-0.66 | 3.1E-05 | 722.52     | Intervertebral disc disorders: degeneration lumbar or lumbosacral intervertebral disc | 71    | 2964  |
| rs1611115 | T                    | -0.84 | 0.22 | 0.43       | 0.28-0.67 | 0.0002  | 413.9      | Angina pectoris: unspecified angina pectoris                                          | 103   | 2932  |
| rs1611115 | T                    | 0.66  | 0.21 | 1.9        | 1.3-2.9   | 0.002   | 250.6      | Diabetes mellitus: diabetes with neurological complications                           | 48    | 2987  |
| rs1108580 | A                    | -0.69 | 0.24 | 0.50       | 0.32-0.80 | 0.004   | 780.39     | Convulsions                                                                           | 43    | 2992  |
| rs1108580 | A                    | -0.36 | 0.13 | 0.70       | 0.54-0.90 | 0.007   | 784        | General symptoms: symptoms involving head and neck                                    | 131   | 2904  |
| rs1108580 | A                    | -0.40 | 0.15 | 0.67       | 0.50-0.89 | 0.007   | 413.9      | Angina pectoris: unspecified Angina pectoris                                          | 103   | 2932  |
| rs1611115 | T                    | 0.60  | 0.23 | 1.8        | 1.2-2.9   | 0.008   | 789.01     | Other symptoms involving abdomen and pelvis: abdominal pain, right upper quadrant     | 44    | 2991  |

Data is sorted by p value, filtered at a cutoff of 0.01. The following abbreviations are used: SE, standard error; CI, confidence interval; and Ctrls, controls.

### Supplemental References

1. Wang D, Johnson AD, Papp AC, Kroetz DL, Sadee W. Multidrug resistance polypeptide 1 (MDR1, ABCB1) variant 3435C>T affects mRNA stability. *Pharmacogenet Genomics*. 2005;15:693-704
2. Miller SA, Dykes DD, Polesky HF. A simple salting out procedure for extracting DNA from human nucleated cells. *Nucleic Acids Res*. 1988;16:1215
3. Papp AC, Pinsonneault JK, Cooke G, Sadee W. Single nucleotide polymorphism genotyping using allele-specific PCR and fluorescence melting curves. *Biotechniques*. 2003;34:1068-1072



4. Yuan JS, Reed A, Chen F, Stewart CN, Jr. Statistical analysis of real-time PCR data. *BMC bioinformatics*. 2006;7:85
5. Sherwood, A., Allen, M.T., Fahrenberg, J., Kelsey, R.M., Lovallo, W.R., van Doornen, L.J. (1990). Methodological guidelines for impedance cardiography. *Psychophysiology* 27 (1), 1–23.
6. Berntson, G. G., Norman, G. J., Hawkley, L. C., & Cacioppo, J. T. (2008). Cardiac autonomic balance versus cardiac regulatory capacity. *Psychophysiology*, 45(4), 643-652.
7. Kudielka, B. M., Hellhammer, D. H., & Kirschbaum, C. (2007). Ten years of research with the trier social stress test-revisited. In E. Harmon–Jones & P. Winkielman (Eds.), *Social neuroscience: Integrating biological and psychological explanations of social behavior* (pp. 56–83). New York, NY: Guilford Press.
8. Gottesman O, Kuivaniemi H, Tromp G, et al. The electronic medical records and genomics (EMERGE) network: Past, present, and future. *Genet Med*. 2013;15:761-771
9. Team RDC: R: A language and environment for statistical computing. 2.12.0 edition. Vienna, Austria: The R Foundation for Statistical Computing; 2009
10. McCarty CA, Wilke RA, Giampietro PF, Wesbrook SD, Caldwell MD. Marshfield clinic personalized medicine research project (PMRP): Design, methods and recruitment for a large population-based biobank. *Per. Med*. 2005;2:49-79
11. Zuvich RL, Armstrong LL, Bielinski SJ, et al. Pitfalls of merging GWAS data: Lessons learned in the EMERGE network and quality control procedures to maintain high data quality. *Genet. Epidemiol*. 2011;35:887-898
12. Sempos CT, Bild DE, Manolio TA. Overview of the Jackson Heart Study: A study of cardiovascular diseases in African American men and women. *Am. J. Med. Sci*. 1999;317:142-146
13. Keating BJ, Tischfield S, Murray SS, et al. Concept, design and implementation of a cardiovascular gene-centric 50 k SNP array for large-scale genomic association studies. *PloS one*. 2008;3:e3583
14. Fox ER, Young JH, Li Y, et al. Association of genetic variation with systolic and diastolic blood pressure among African Americans: The candidate gene association resource study. *Hum. Mol. Genet*. 2011;20:2273-2284
